# Supplementary material
Source: PubMed Central journal article supplement (PMC4508855)

Supplementary Information

Figure 1 Piperine molecular structure

Figure 2 Piperine chromatogram in (A) ambient light, (B) red light, (C) minimal light processing

Figure 1 Piperine molecular structure

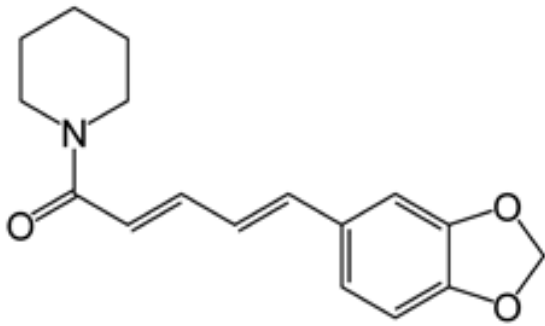

Figure 2 (A) Piperine spit peak when samples were processed in light

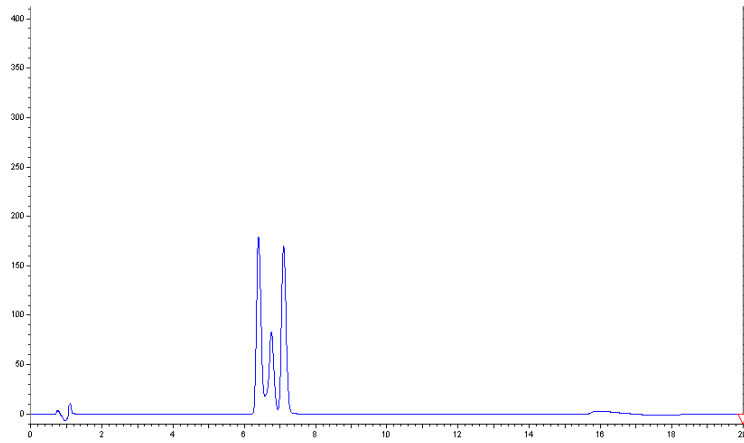

(B) Piperine split peak when processed after 6 hours in red light

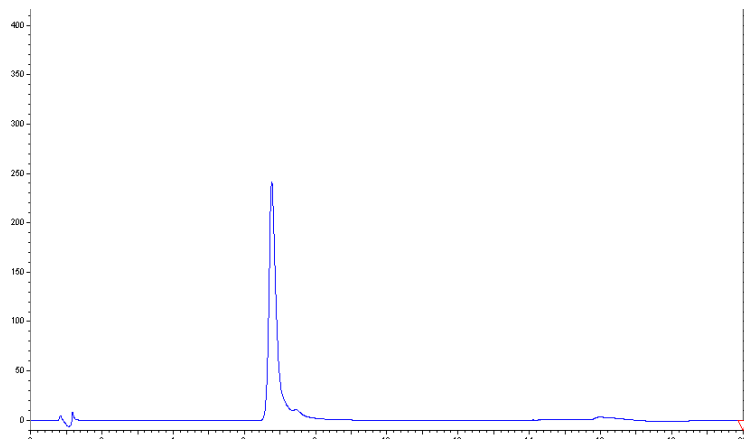

(C) Piperine single peak when processed in minimal ambient light

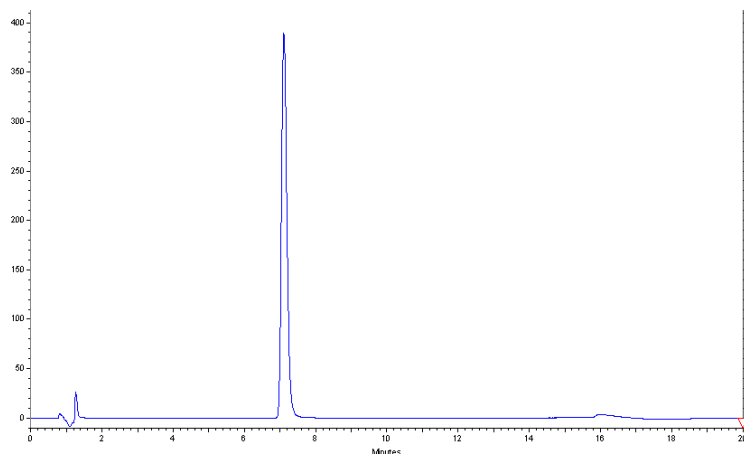

Supplement: NIHMS593842-supplement-1.pdf [file NIHMS593842-supplement-1.pdf]
